# Supplementary material for: Effect of the stiffness of one-layer protein-based microcapsules on dendritic cell uptake and endocytic mechanism
Source: Royal Society of Chemistry journal article supplement (doi:10.1039/d1bm01448j), 2021-11-08
Supplement: d1bm01448j1.pdf [file d1bm01448j1.pdf]

Electronic supplementary information  
for

**Effect of the stiffness of one-layer protein-based microcapsules on  
dendritic cell uptake and endocytic mechanism**

*Pengzhong Shi,<sup>a, b</sup> Jianghui Qin,<sup>a</sup> Shan Luo,<sup>a</sup> Pengyan Hao,<sup>a</sup> Na Li<sup>\*, b</sup> and Xingjie Zan<sup>\*, a, b</sup>*

<sup>a</sup> School of Ophthalmology and Optometry, Eye Hospital, School of Biomedical Engineering,  
Wenzhou Medical University, Wenzhou, Zhejiang Province, 325035, P. R. China

<sup>b</sup> Engineering Research Center of Clinical Functional Materials and Diagnosis & Treatment  
Devices of Zhejiang Province, Wenzhou Institute, University of Chinese Academy of  
Sciences (Wenzhou Institute of Biomaterials & Engineering), Wenzhou, Zhejiang Province,  
325001, P. R. China

**\*\*Corresponding Author.**

\*Na Li, E-mail: [lina@ucas.ac.cn](mailto:lina@ucas.ac.cn);

\*Xingjie Zan, E-mail: [zanxj@ucas.ac.cn](mailto:zanxj@ucas.ac.cn), Tel: +86 577 8017519.

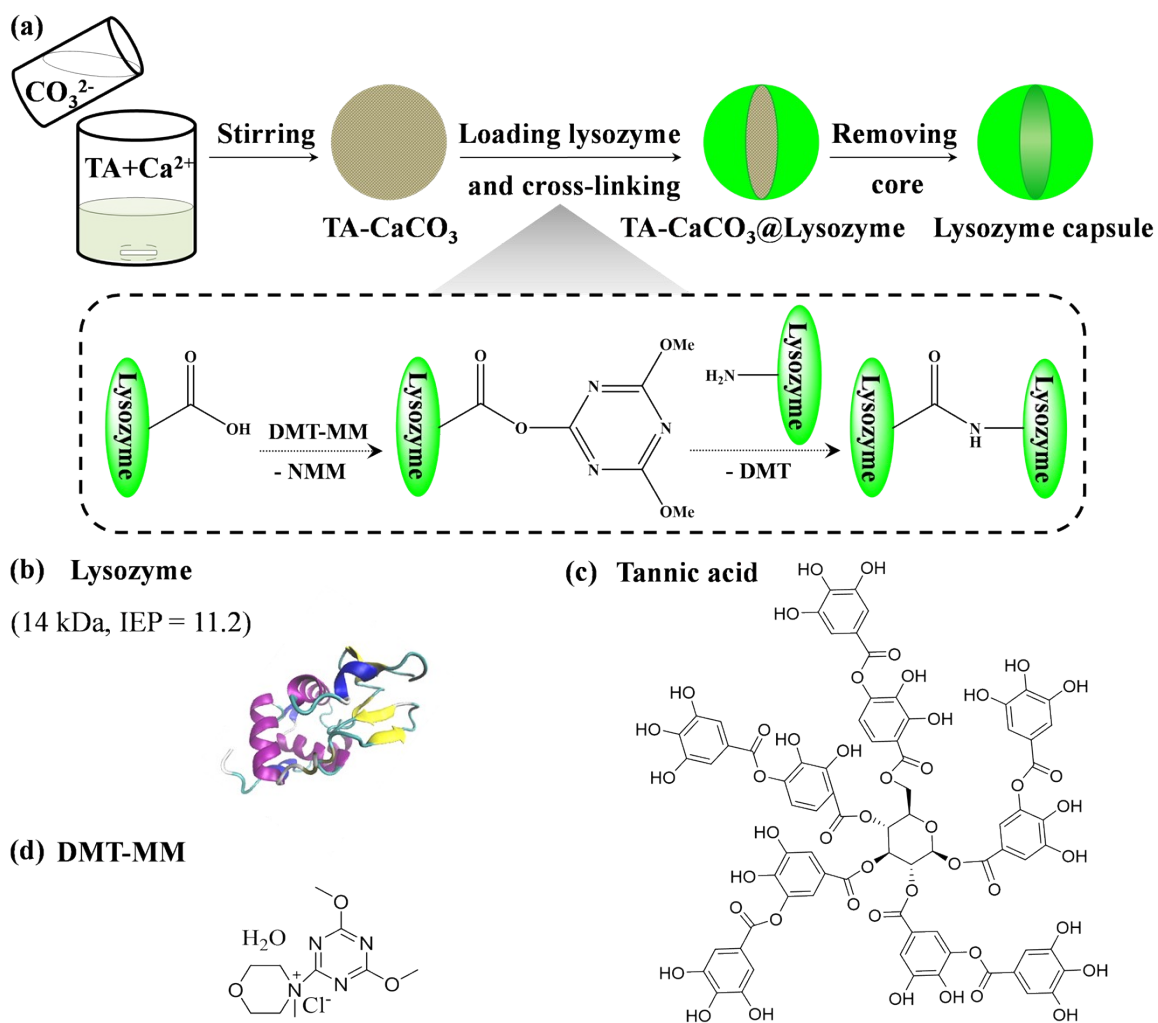

**Figure S1.** (a) Schematic illustration of the fabrication process of lysozyme capsules. Protein cross-linking mechanism via DMT-MM (insert section). (b) Cartoons of lysozyme molecule (1VDQ), which was referenced from the protein database files (<http://www.rcsb.org>). Molecular structures of (c) tannic acid (TA) and (d) 4-(4,6-dimethoxy-1,3,5-triazin-2-yl)-4-methyl morpholinium chloride (DMT-MM).

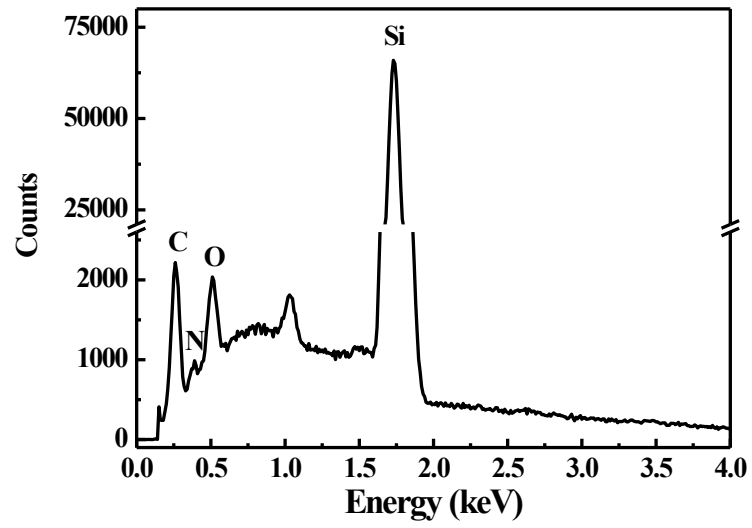

**Figure S2.** EDX analysis of lysozyme capsules.

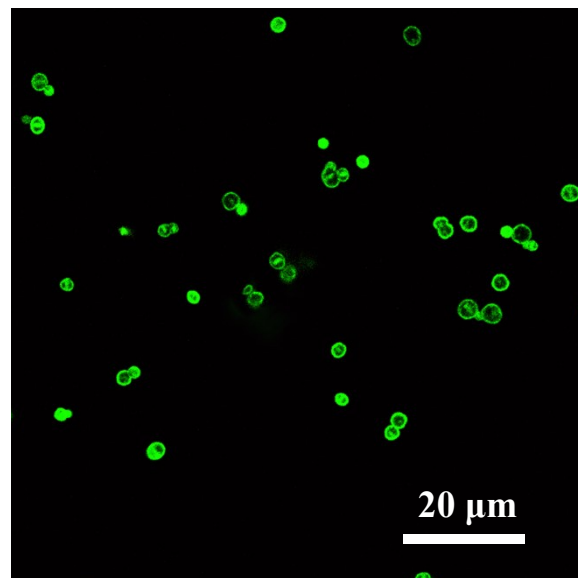

**Figure S3.** LSCM images of FITC-lysozyme capsules incubated with aqueous solution (pH 7.4) for three months at 4°C.

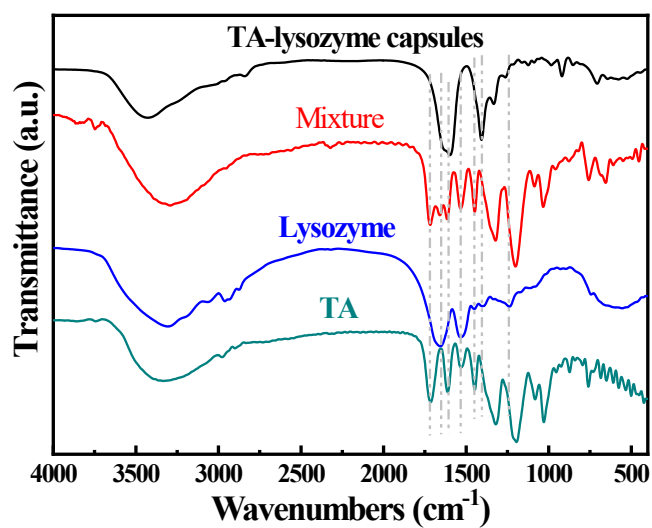

**Figure S4.** FT-IR spectra of TA, lysozyme, mixture of TA and lysozyme, and lysozyme capsule, respectively.

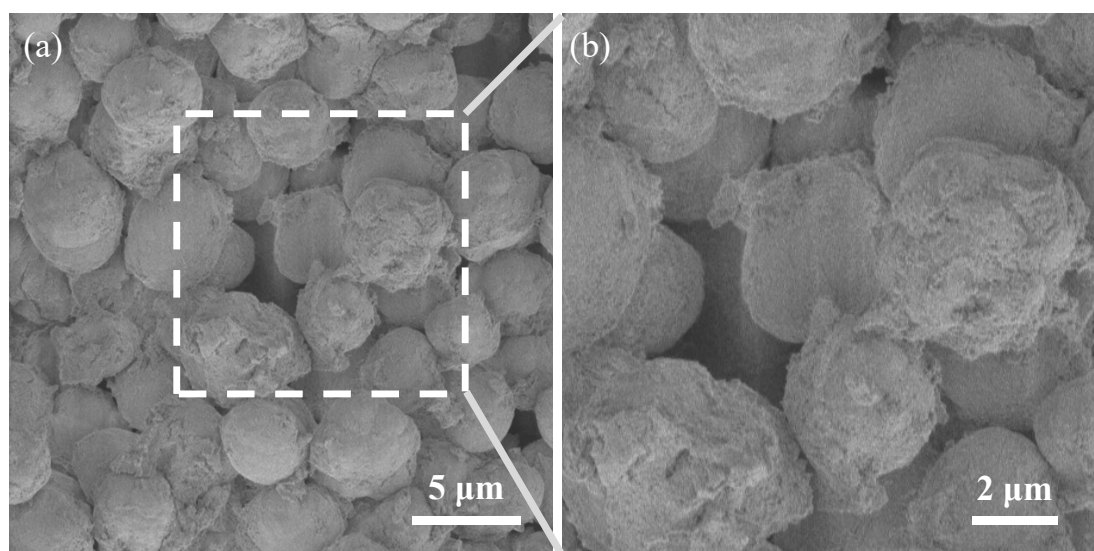

**Figure S5.** (a) Overview and (b) magnified SEM images of TA-200/CaCO<sub>3</sub> particles.

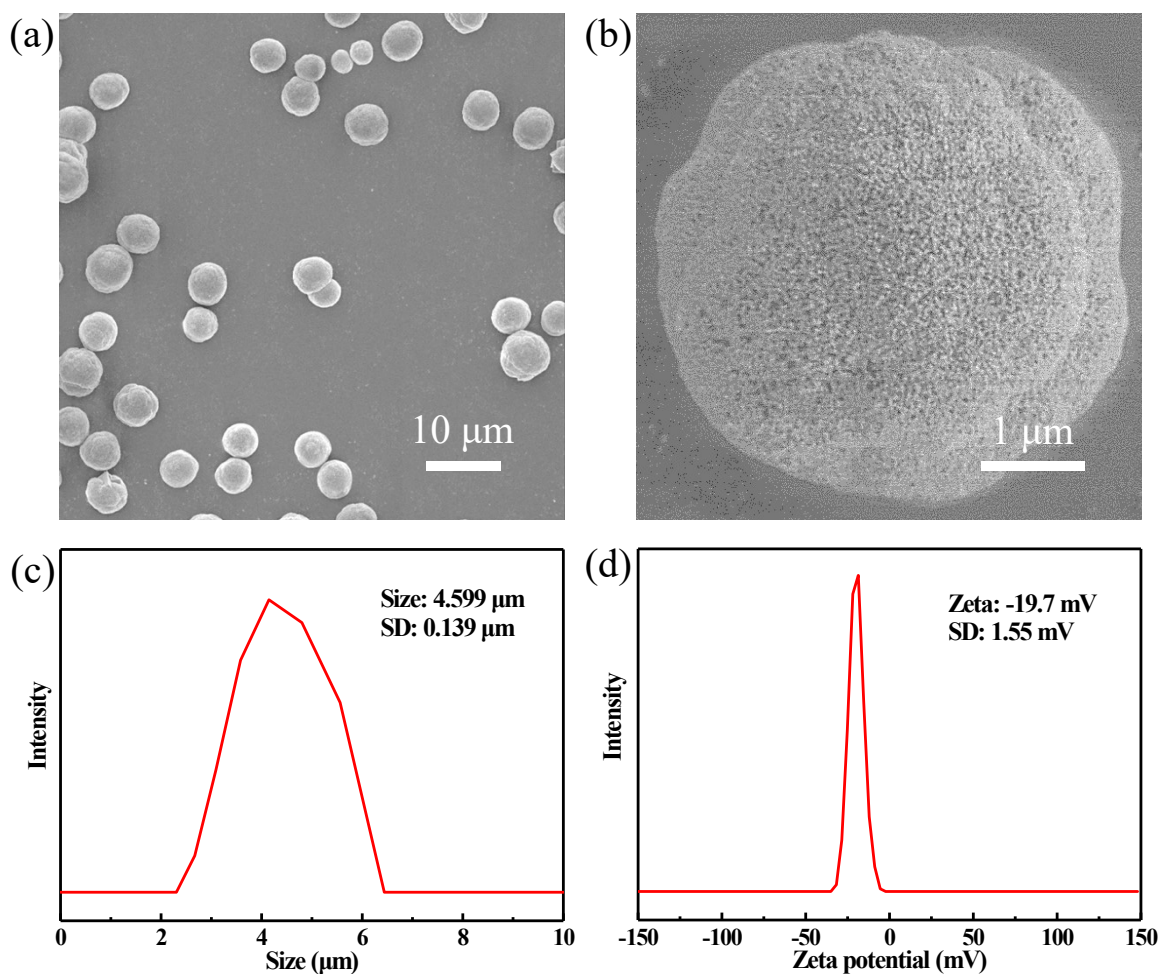

**Figure S6.** (a) Overview and (b) magnified SEM images of TA-50/CaCO<sub>3</sub> particles; (c) the size distribution and (d) zeta potential of TA-50/CaCO<sub>3</sub> particles at pH 7.0.

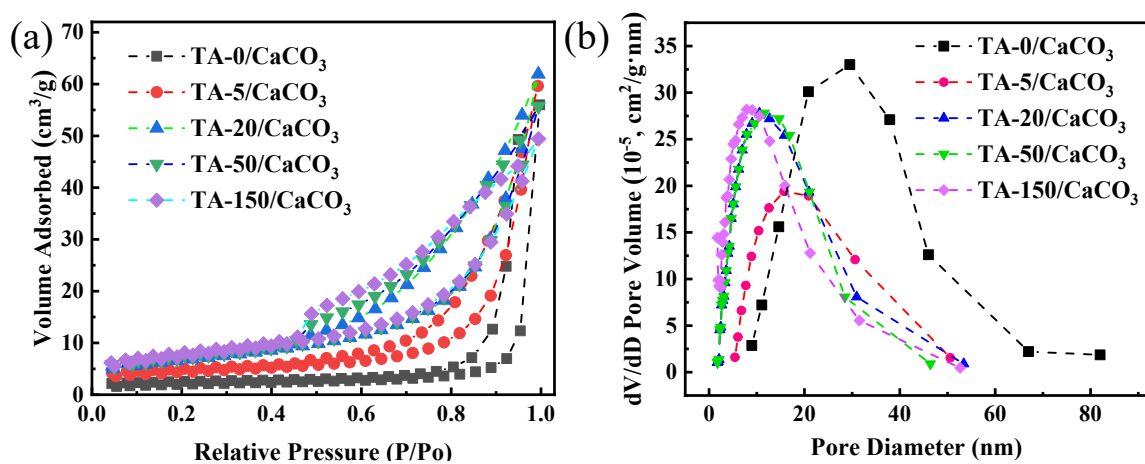

**Figure S7.** (a) N<sub>2</sub> adsorption-desorption isotherms of TA/CaCO<sub>3</sub> microparticles; (b) BJH average pore size distributions of TA/CaCO<sub>3</sub> particles.

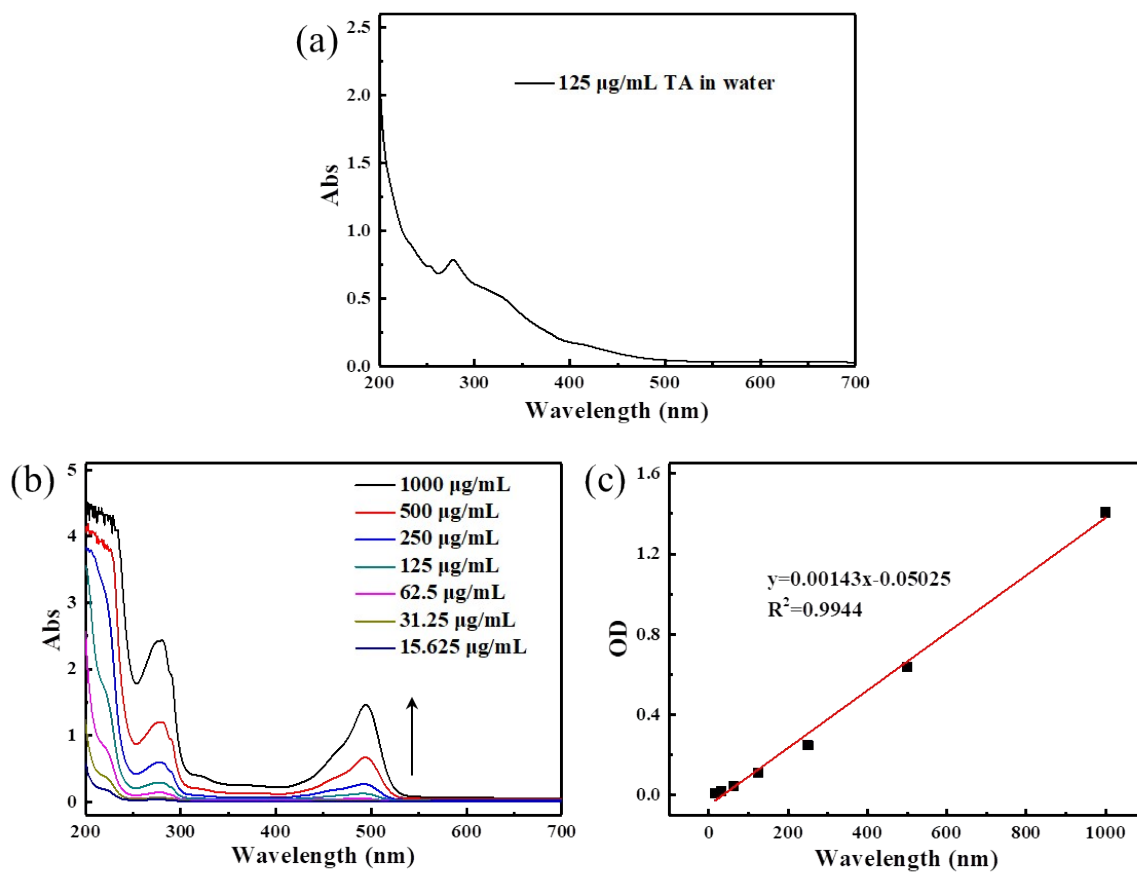

**Figure S8.** UV-vis spectra of TA in water (a, 125 µg/mL) and FITC-lysozyme with diluted solutions (b, 15.625-1000 µg/mL). (c) The standard curve of lysozyme at 494 nm ( $R^2 = 0.9944$ ).

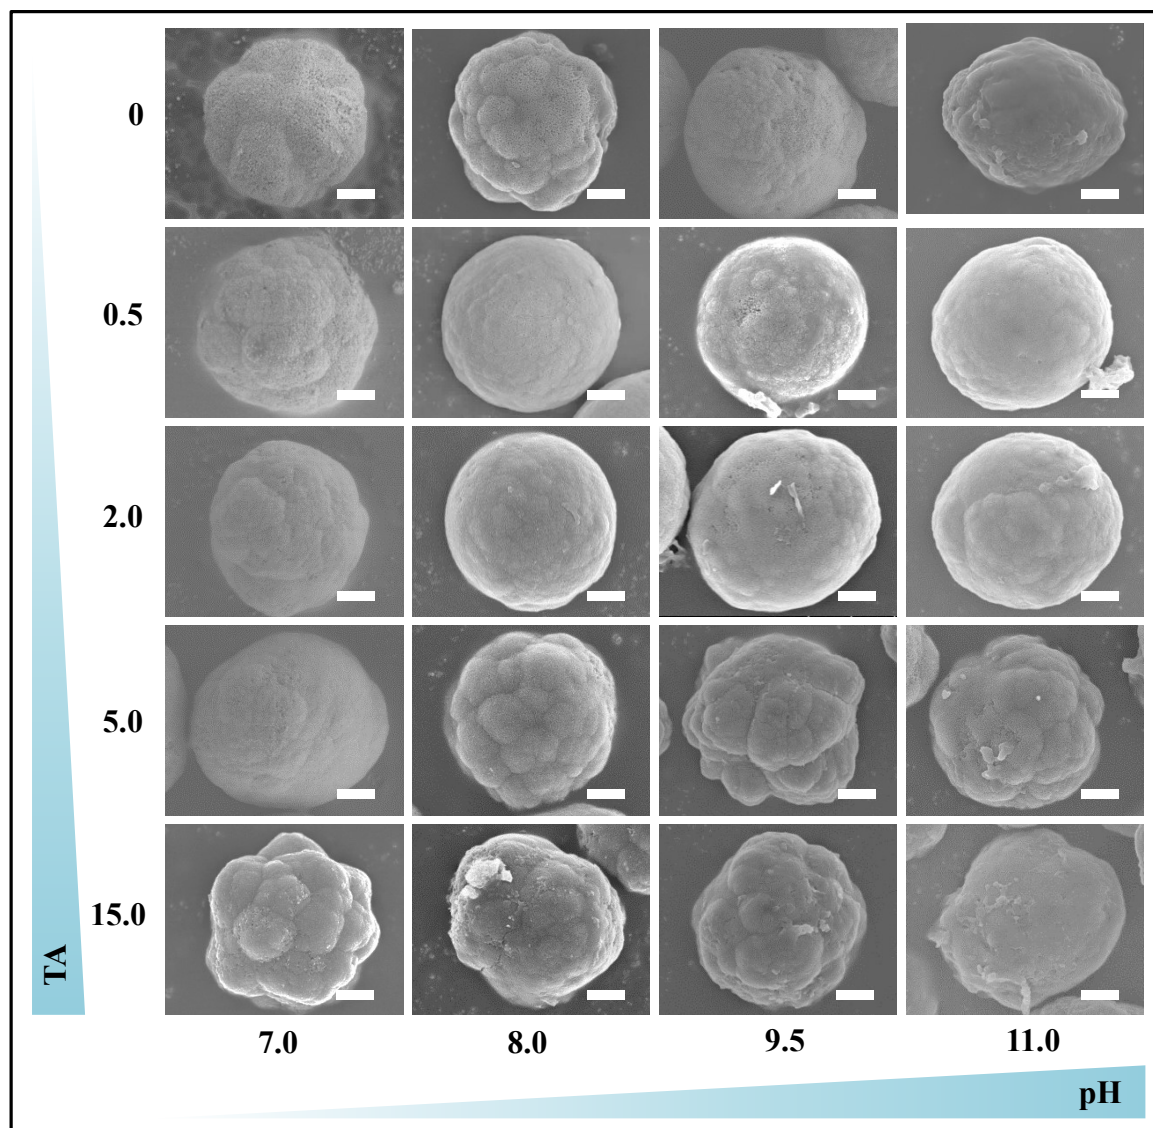

**Figure S9.** SEM images of lysozyme adsorption on particles at different doping contents of TA and pH values of lysozyme solution. All scale bars are 1 μm.

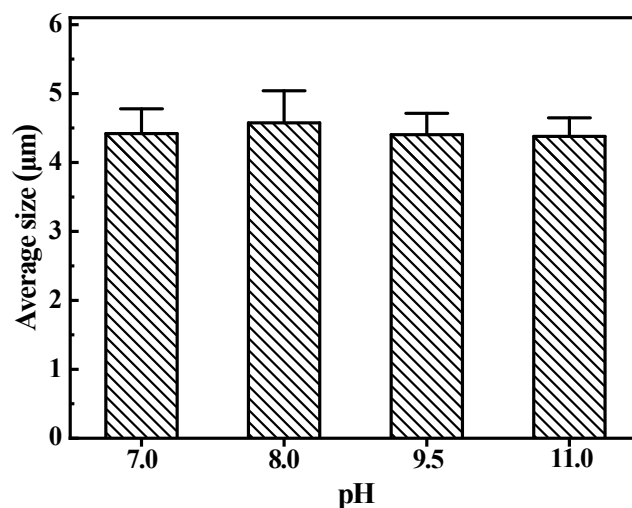

**Figure S10.** The average size of lysozyme capsules prepared under pH 7.0, 8.0, 9.5, and 11.0. For SEM images of capsule, 100 capsules were measured and their average size was calculated in each group.

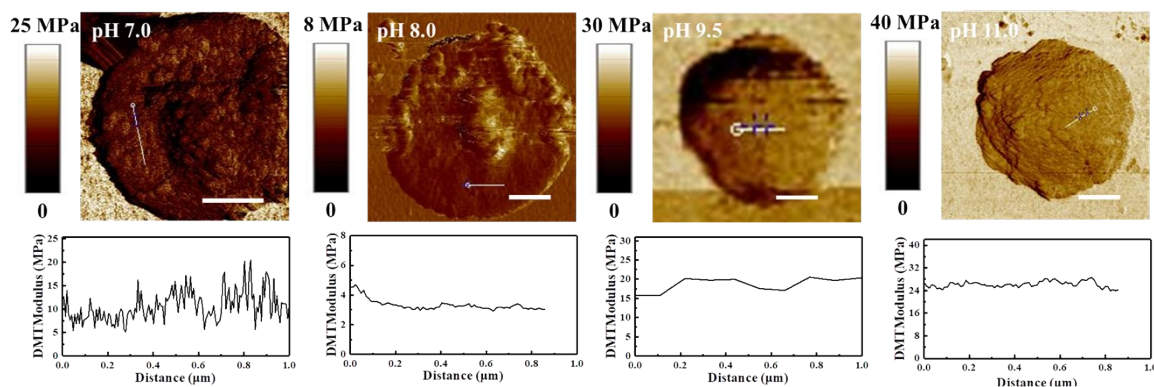

**Figure S11.** Modulus images and their corresponding sections of lysozyme capsules prepared at pH 7.0, 8.0, 9.5, and 11.0 and tested by AFM in water. All scale bars are 1 μm.



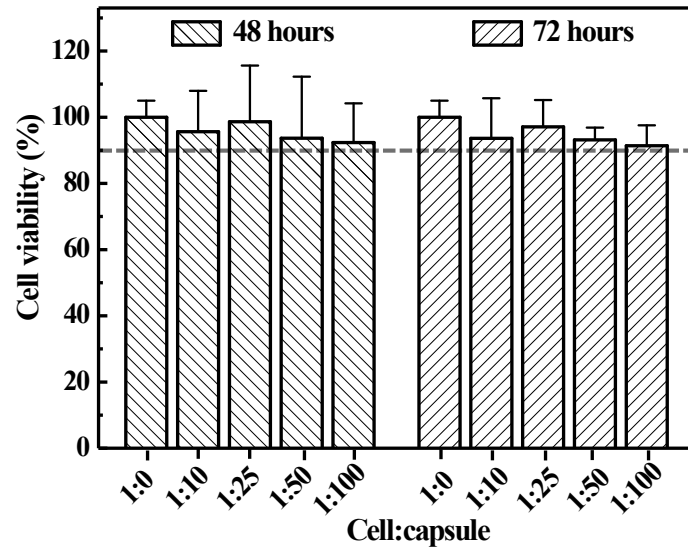

**Figure S12.** CCK-8 assay of lysozyme capsules on DC cells. Cells were incubated at the indicated capsule ratio for 48 h or 72 h. The results are average values with standard deviations (mean  $\pm$  S.D., N=5).

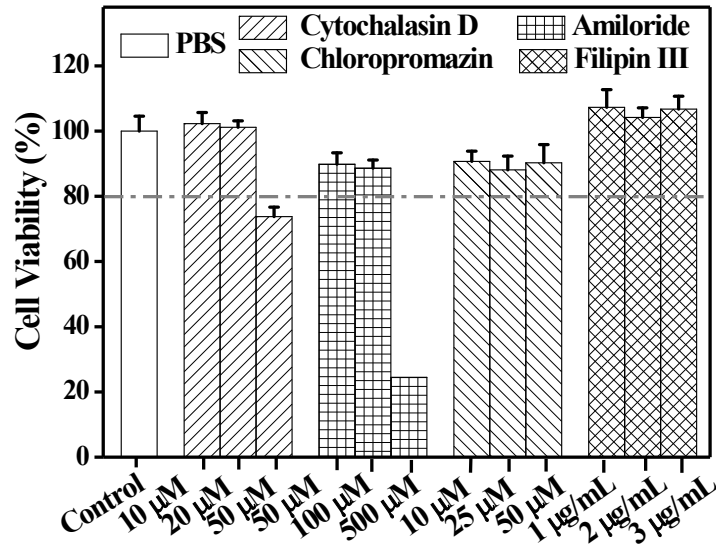

**Figure S13.** CCK-8 assay of inhibitors, including cytochalasin D, amiloride, chlorpromazin, and filipin III at indicated concentrations on DC cells for 48 hours. The results are average values with standard deviations (mean  $\pm$  S.D., N=5).

**Table S1. Illustration of the different cellular organelles/structures studied for their co-localization with the FITC-lysozyme capsules as well as their associated uptake pathways. The antibody IgG (H+L) or markers used for staining as well as their concentrations ( $C_{final}$ ) used are additionally presented.**

| Cellular structure          | IgG/markers                                         | $C_{final}$ | Endocytic pathway             | Co-localization |
|-----------------------------|-----------------------------------------------------|-------------|-------------------------------|-----------------|
| Phagolysosomes              | Primary, rabbit anti-LAMP 1 <sup>a</sup> antibody   | 1.5 µg/mL   | Phagocytosis                  | Yes             |
|                             | Secondary, Alexa Fluor 647-labeled goat anti-rabbit | 1.3 µg/mL   |                               |                 |
| Clathrin-coated vesicles    | Primary, rabbit anti-clathrin heavy chain antibody  | 7.5 µg/mL   | Clathrin-mediated endocytosis | No              |
|                             | Secondary, Alexa Fluor 647-labeled goat anti-rabbit | 20 µg/mL    |                               |                 |
| Caveolin-coated lipid rafts | Primary, rabbit anti-caveolin-1 antibody            | 4 µg/mL     | Caveolin-mediated endocytosis | No              |
|                             | Secondary, Alexa Fluor 647-labeled goat anti-rabbit | 3.5 µg/mL   |                               |                 |
| Nucleus                     | DAPI                                                | 50 µM       | n/a.                          | n/a.            |

<sup>a</sup> Lysosomal-associated membrane protein 1.

**Table S2. Illustration of the different habitation used to study their uptake pathways of lysozyme-based capsules.**

| Inhibitor      | Concentration | Endocytic pathway             | Quantification of inhibition |
|----------------|---------------|-------------------------------|------------------------------|
| Cytochalasin D | 20 µM         | Phagocytosis                  | 89.3~92.1%                   |
| Amiloride      | 50 µM         | Micropinocytosis              | 60.2~75.5%                   |
| Chlorpromazine | 10 µM         | Clathrin-mediated endocytosis | 4.9~47.2%                    |
| Filipin III    | 1 µg/mL       | Caveolin-mediated endocytosis | 2.8~40.7%                    |
